# Supplementary material
Source: Springer Nature journal article supplement (https://www.springermedizin.de/resource/supplementary/13046_2008_57_MOESM2_ESM.pdf/9661422)

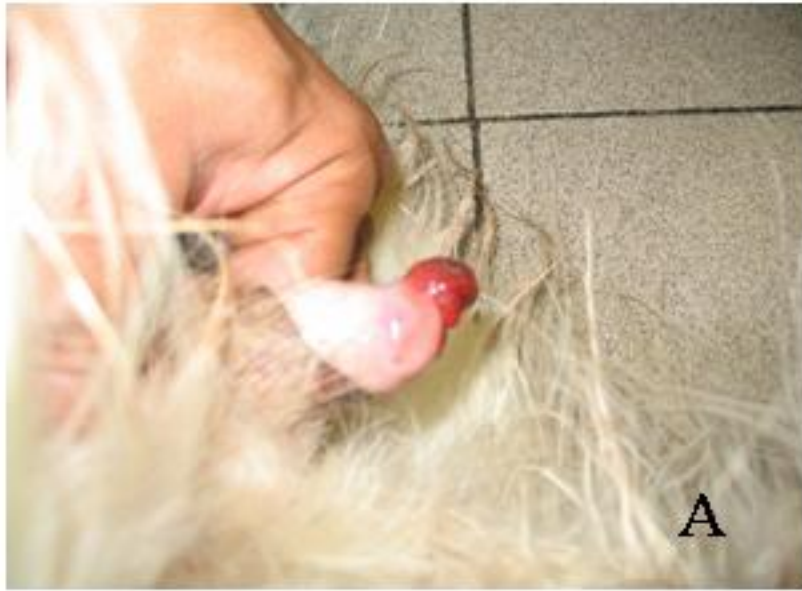

A

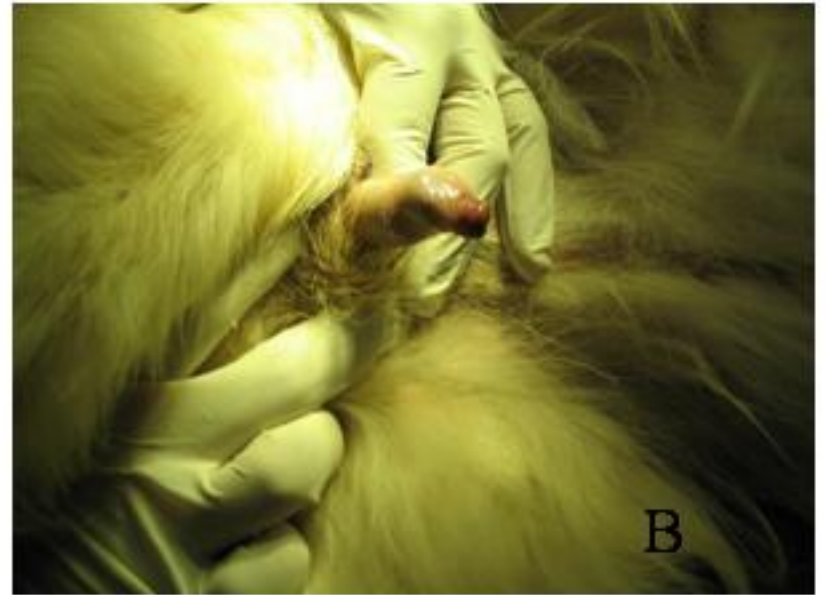

B

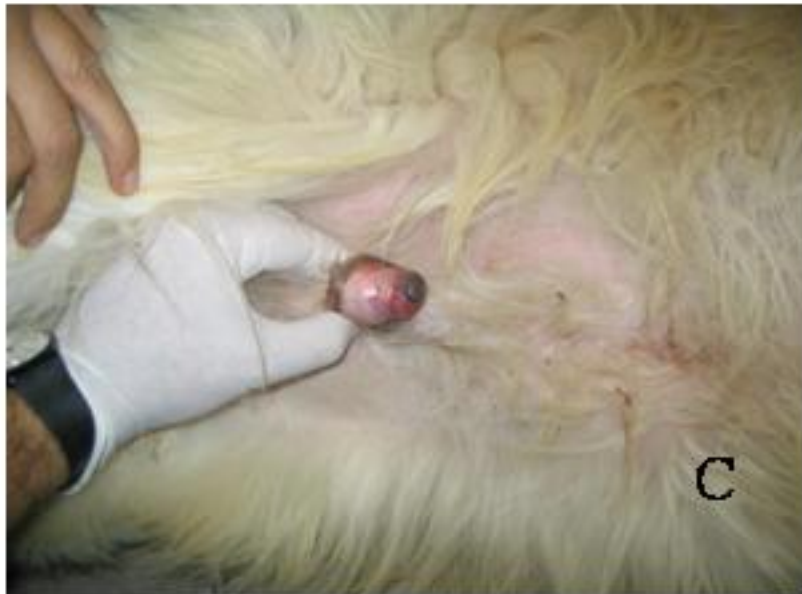

C

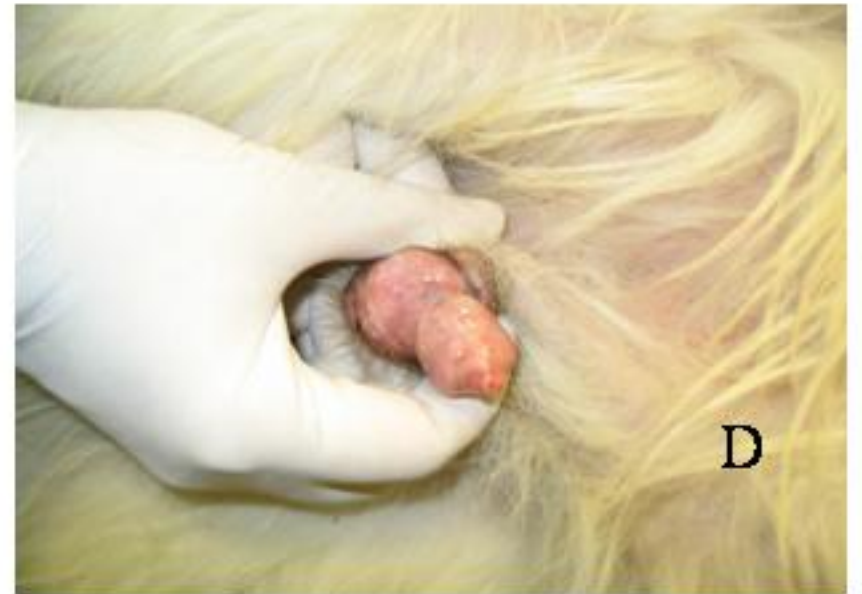

D

Supplement: MOESM2 [file 9661422]
